# Supplementary material for: Identification of Listeria monocytogenes Determinants Required for Biofilm Formation
Source: PubMed Central journal article supplement (PMC4269431; doi:10.1371/journal.pone.0113696), 2014-12-17
Supplement: pone.0113696.s001.pdf [file pone.0113696.s001.pdf]

**Table S1.** *Listeria monocytogenes* strains and plasmids used in this study.

| <b><i>Listeria monocytogenes</i> strain or plasmid</b> | <b>Strain genotype or plasmid description</b>       | <b>Reference</b> |
|--------------------------------------------------------|-----------------------------------------------------|------------------|
| 10403S                                                 | Laboratory wild-type strain                         | [1]              |
| DH-L2052                                               | (DP-L5539) 10403S <i>Himar1</i> transposon library  | [2]              |
| DH-L2053                                               | 10403S <i>flaA::Himar1</i>                          | This study       |
| DH-L2054                                               | 10403S $\Delta dltABCD$                             | This study       |
| DH-L2055                                               | 10403S $\Delta phoPR$                               | This study       |
| pKSV7                                                  | Allelic exchange vector for <i>L. monocytogenes</i> | [3]              |
| pKSV7 $\Delta dltABCD$                                 | Plasmid for in-frame deletion of <i>dltABCD</i>     | This study       |
| pKSV7 $\Delta phoPR$                                   | Plasmid for in-frame deletion of <i>phoPR</i>       | This study       |

**Table S2.** Oligonucleotides used in this study.

| <b>Primer name</b> | <b>Sequence (5'-3')</b>                                         | <b>Site<sup>a</sup>/<br/>Reference</b> |
|--------------------|-----------------------------------------------------------------|----------------------------------------|
| ARB1               | GGCCACGCGTCGACTAGTACNNNNNNNNNNNGTAAT                            | [4]                                    |
| marK3              | GCAATGAAACACGCCAAAGTAAAC                                        | [5]                                    |
| ARB2               | GGCCACGCGTCGACTAGTAC                                            | [4]                                    |
| marK4              | CGCCTACGGGGAATTTGTATC                                           | [5]                                    |
| pKSV7dltABCDfor    | AAGTCGACTATCCACATAATGAAGAAATAATCCATGC<br>TCCACAATCCCTGG         | <i>Sall</i>                            |
| pKSV7dltABCRev     | AAGGATCCGCACTCATGCCATCTGCATTTAGTCCAT<br>CCTTTGACAG              | <i>BamHI</i>                           |
| dltABCdelfor       | CCATTTTCTGGATGTTCTTTAAAGTAATACATTATTGA<br>TATTCCCATTTTAAACAGTCC |                                        |
| dltABCdelrev       | GGACTGTTAAAAATGGGAATATCAATAATGTATTACT<br>TTAAAGAACATCCAGAAAATGG |                                        |
| pKSV7phoPRfor      | GATCGGATCCGCTATTATTTTGTGTGAG                                    | <i>BamHI</i>                           |
| pKSV7phoPRrev      | GATCGAATTCGTTTCATAAGACCAGATTTTCC                                | <i>EcoRI</i>                           |
| phoPRdelfor        | CATAAAGAAGGGATGGGAAGTAAAAAAGCCTAATAA<br>ATATCC                  |                                        |
| phoPRdelrev        | GGATATTTATTAGGCTTTTTTACTTCCCATCCCTTCTT<br>TATG                  |                                        |

a. The indicated restriction endonuclease site is underlined within the oligonucleotide sequence. N denotes equal concentrations of all four nucleotides.

## REFERENCES

1. Bishop DK, Hinrichs DJ (1987) Adoptive transfer of immunity to *Listeria monocytogenes*. The influence of *in vitro* stimulation on lymphocyte subset requirements. J Immunol 139: 2005-2009.
2. Zemansky J, Kline BC, Woodward JJ, Leber JH, Marquis H, et al. (2009) Development of a mariner-based transposon and identification of *Listeria monocytogenes* determinants, including the peptidyl-prolyl isomerase PrsA2, that contribute to its hemolytic phenotype. J Bacteriol 191: 3950-3964.
3. Smith K, Youngman P (1992) Use of a new integrational vector to investigate compartment-specific expression of the *Bacillus subtilis* *spoIIIM* gene. Biochimie 74: 705-711.
4. Garsin DA, Urbach J, Huguet-Tapia JC, Peters JE, Ausubel FM (2004) Construction of an *Enterococcus faecalis* Tn917-mediated-gene-disruption library offers insight into Tn917 insertion patterns. J Bacteriol 186: 7280-7289.
5. Perry KJ, Higgins DE (2013) A differential fluorescence-based genetic screen identifies *Listeria monocytogenes* determinants required for intracellular replication. J Bacteriol 195: 3331-3340.
